# Supplementary material for: In-Situ Synthesis of Methyl Cellulose Film Decorated with Silver Nanoparticles as a Flexible Surface-Enhanced Raman Substrate for the Rapid Detection of Pesticide Residues in Fruits and Vegetables
Source: MDPI journal article supplement (doi:10.3390/ma14195750), 2021-10-01
Supplement: s1 [file s1]

# In-situ synthesis of methyl cellulose film decorated with silver nanoparticles as a flexible surface-enhanced Raman substrate for rapid detection of pesticide residues in fruits and vegetables

Qijia Zhang <sup>1</sup>, Guangda Xu <sup>1</sup>, Na Guo <sup>1</sup>, Tongtong Wang <sup>1</sup>, Peng Song <sup>2,\*</sup> and Lixin Xia <sup>1,\*</sup>

<sup>1</sup> College of Chemistry, Liaoning University, Shenyang 110036, China; zqj13940305120@163.com (Q.Z.); xuguangdalnu@163.com (G.X.); 18404713138@163.com (N.G.); 18340312652@163.com (T.W.)

<sup>2</sup> Yingkou Institute of Technology, Yingkou 115014, China

\* Correspondence: songpeng@lnu.edu.cn (P.S.); lixinxia@lnu.edu.cn (L.X.); Tel.: +86-24-62202258 (L.X.)

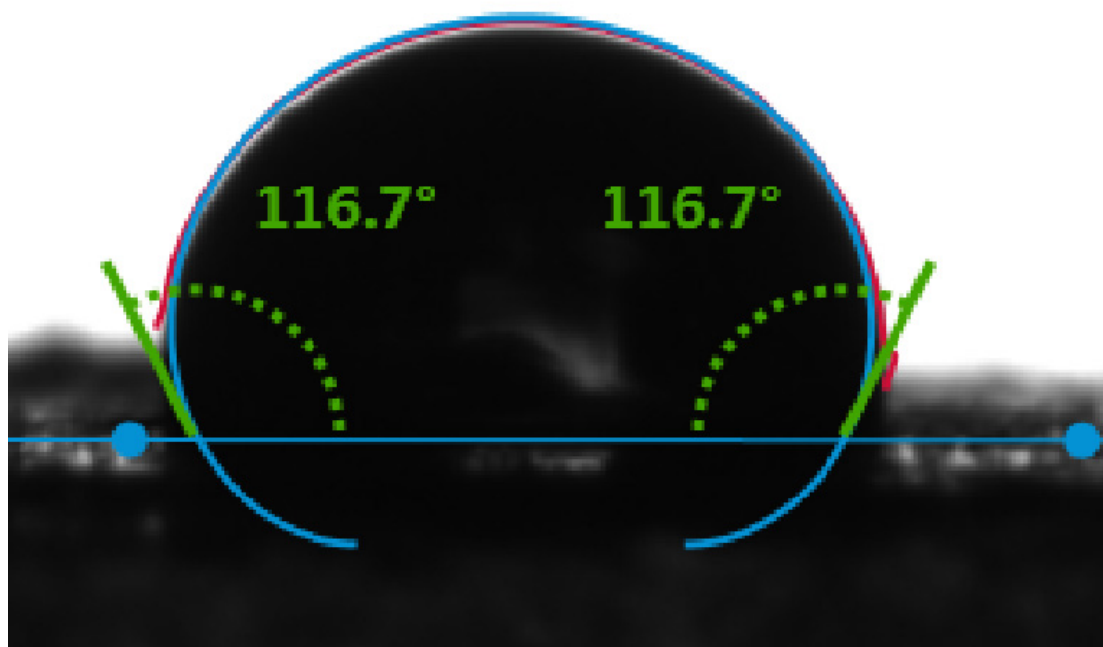

**Figure S1.** Contact Angle of MC/Ag NPs film.

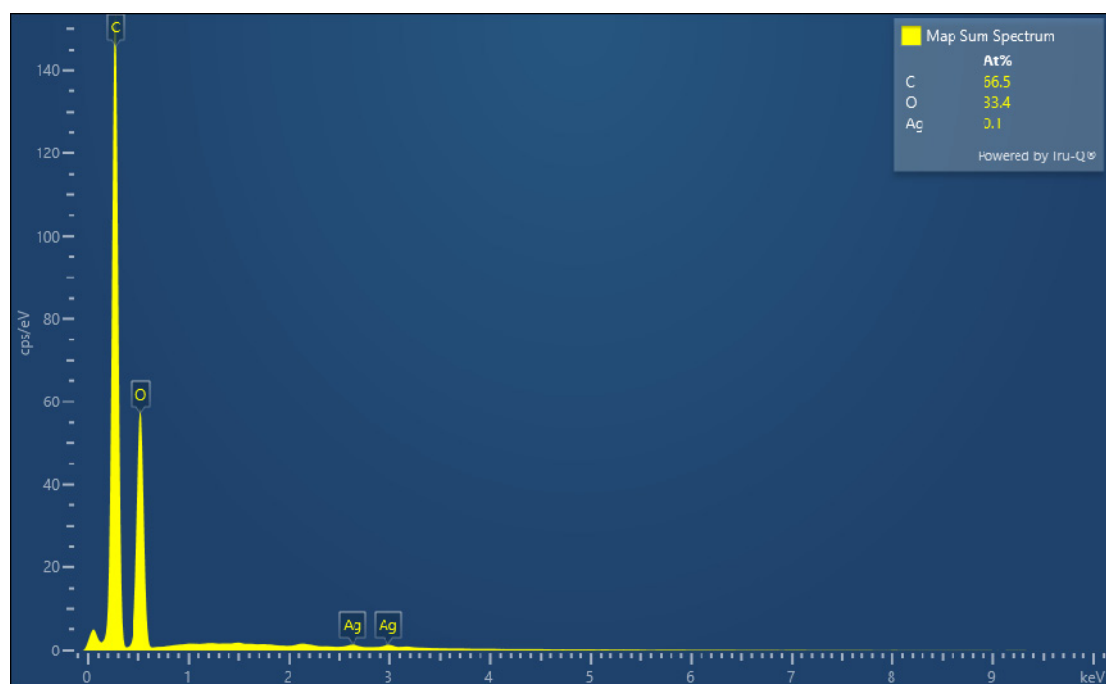

**Figure S2.** EDS image of MC/Ag NPs film SERS sute.bstra.
